# Supplementary material for: Cationic diphosphaferrocene gallium dichloride complexes
Source: Royal Society of Chemistry journal article supplement (doi:10.1039/b204075c), 2002-01-01
Supplement: b204075c.doc [file b204075c.doc]

**Supporting Information for :**

**Cationic Diphosphaferrocenes Gallium dichloride complexes**

Xavier Sava, Mohand Melaimi, Nicolas Mézailles, Louis Ricard,

François Mathey* and Pascal Le Floch*

#### Table S1: Cartesian coordinates, optimized geometry of the [Ga (tmdpf) Cl2]+ complex.

Table S2: Cartesian coordinates, optimized geometry of the tmdpf ligand.

Table S3: Cartesian coordinates, optimized geometry of the [Ga(dpe)Cl2]+ 2 pages

#### Some MOs orbitals of the [Ga(tmdpf)Cl2]+ complex as given by DFT. 3 pages

#### Some MOs orbitals of the tmdpf ligand as given by DFT. 3 pages.

#### **TABLE S1: Bond distances and angles of the theoretical structure of the [Ga(tmdpf)Cl2]+ complex.**

---------------------------------------------------------------------

Center Atomic Atomic Coordinates (Angstroms)

Number Number Type X Y Z

---------------------------------------------------------------------

1 15 0 0.191583 0.000026 -1.989082

2 6 0 -1.027223 -1.306139 -1.663898

3 6 0 -2.324198 -0.722088 -1.537114

4 6 0 -1.029124 1.304488 -1.664179

5 6 0 -2.325259 0.718564 -1.537288

6 31 0 1.649791 0.000583 -0.000362

7 26 0 -1.149563 -0.000611 0.000141

8 17 0 2.714169 -1.889972 0.000094

9 17 0 2.712845 1.891902 -0.000410

10 6 0 -1.027317 -1.305092 1.664891

11 6 0 -2.324027 -0.720630 1.537839

12 6 0 -1.028051 1.305496 1.663962

13 6 0 -2.324482 0.720125 1.537235

14 15 0 0.192234 0.000551 1.989022

15 6 0 -0.740794 -2.778844 1.777361

16 6 0 -0.742491 2.779383 1.775541

17 6 0 -0.744169 2.778478 -1.776547

18 6 0 -0.740186 -2.779747 -1.775845

19 1 0 -3.232781 -1.315778 -1.409496

20 1 0 -3.234755 1.310871 -1.409772

21 1 0 -3.232912 -1.313924 1.410488

22 1 0 -3.233602 1.312914 1.409388

23 1 0 -0.758194 -3.077631 2.840165

24 1 0 0.250198 -3.040469 1.376192

25 1 0 -1.506641 -3.372905 1.255407

26 1 0 -0.760240 3.078758 2.838185

27 1 0 -1.508620 3.372697 1.253162

28 1 0 0.248438 3.041374 1.374450

29 1 0 0.246703 3.041053 -1.375701

30 1 0 -1.510434 3.371728 -1.254287

31 1 0 -0.762230 3.077394 -2.839310

32 1 0 0.251226 -3.040716 -1.375280

33 1 0 -0.758260 -3.079083 -2.838487

34 1 0 -1.505366 -3.373892 -1.253011

---------------------------------------------------------------------

SCF Done: E(RB-P86) = -5258.65410349

#### **TABLE S2: Bond distances and angles of the theoretical structure of the tmdpf ligand.**

---------------------------------------------------------------------

Center Atomic Atomic Coordinates (Angstroms)

Number Number Type X Y Z

---------------------------------------------------------------------

1 15 0 1.523270 0.025131 1.762527

2 6 0 -1.076004 0.737747 1.580841

3 6 0 -1.073547 -0.700378 1.599213

4 6 0 0.248260 -1.253250 1.670853

5 6 0 0.244019 1.296646 1.638718

6 6 0 0.524048 2.779465 1.694717

7 6 0 0.532776 -2.733307 1.764145

8 26 0 0.000000 0.000000 0.000000

9 15 0 1.523300 -0.024963 -1.762527

10 6 0 0.248276 1.253418 -1.670776

11 6 0 -1.073502 0.700638 -1.599182

12 6 0 -1.075989 -0.737549 -1.580948

13 6 0 0.244034 -1.296417 -1.638870

14 6 0 0.532898 2.733475 -1.763977

15 6 0 0.523956 -2.779373 -1.694931

16 1 0 -1.984222 1.341629 1.495026

17 1 0 -1.979630 -1.309494 1.528763

18 1 0 0.525269 3.126694 2.744171

19 1 0 1.507141 3.029984 1.265000

20 1 0 -0.242737 3.360153 1.154510

21 1 0 0.537888 -3.053726 2.822113

22 1 0 -0.234467 -3.328644 1.241196

23 1 0 1.515213 -2.992050 1.337921

24 1 0 -1.979600 1.309708 -1.528671

25 1 0 -1.984222 -1.341431 -1.495224

26 1 0 1.515060 2.992279 -1.337158

27 1 0 0.538635 3.053848 -2.821945

28 1 0 -0.234680 3.328873 -1.241500

29 1 0 -0.243027 -3.359940 -1.154922

30 1 0 0.525391 -3.126434 -2.744446

31 1 0 1.506943 -3.029907 -1.265015

---------------------------------------------------------------------

SCF Done: E(RB-P86) = -2413.58317085

#### **TABLE S3: Bond distances and angles of the theoretical structure of the [Ga(dpe)Cl2]+ complex.**

---------------------------------------------------------------------

Center Atomic Atomic Coordinates (Angstroms)

Number Number Type X Y Z

---------------------------------------------------------------------

1 31 0 0.740283 0.001213 -0.000252

2 17 0 1.672242 1.878958 -0.476320

3 17 0 1.712958 -1.856301 0.470284

4 15 0 -1.071062 -0.430884 -1.611558

5 1 0 -1.047755 -1.613372 -2.390015

6 1 0 -1.306692 0.585310 -2.571647

7 15 0 -1.070638 0.411776 1.616280

8 1 0 -1.307187 -0.612972 2.567117

9 1 0 -1.048487 1.587439 2.404993

10 6 0 -2.614131 -0.531552 -0.568180

11 1 0 -3.502340 -0.395853 -1.204016

12 1 0 -2.654048 -1.556601 -0.164451

13 6 0 -2.612119 0.520622 0.571948

14 1 0 -3.501780 0.389574 1.206745

15 1 0 -2.645888 1.545916 0.168239

---------------------------------------------------------------------

SCF Done: E(RB-P86) = -3608.84642918

**Molecular Orbitals of [Ga(tmdpf)Cl2]+ calculated at the BP86/DZVP2 (C, H, P, Fe) DZVP (Ga) level of theory.**


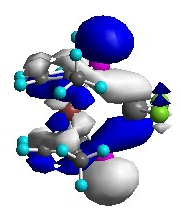


LUMO


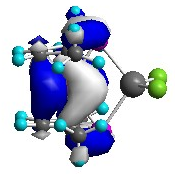


HOMO


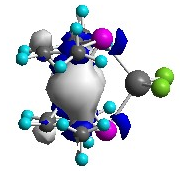


H-1


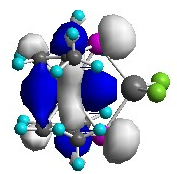


H-2


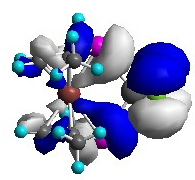


H-3


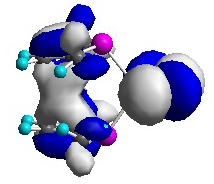


H-4


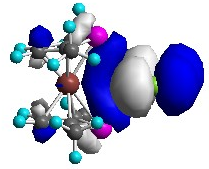


H-5


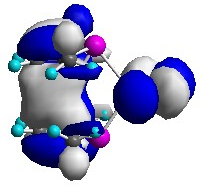


H-6


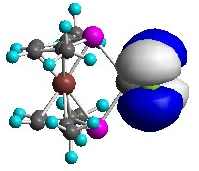


H-7


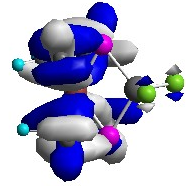


H-8


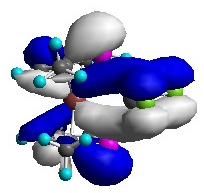


H-9


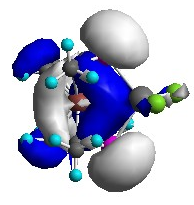


H-10


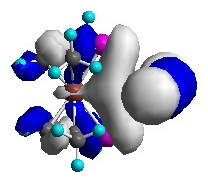


H-11


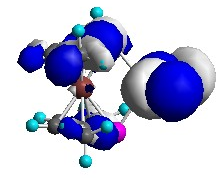


H-12


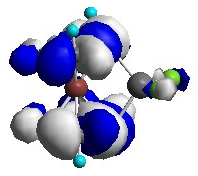


H-13


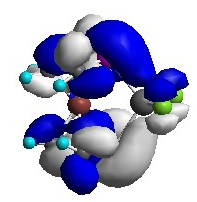


H-14


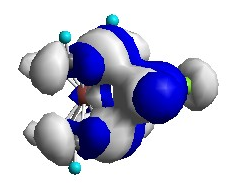


H-15


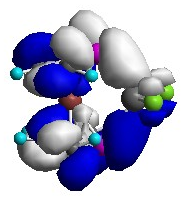


H-16


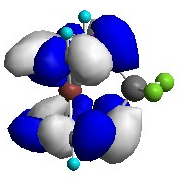


H-17


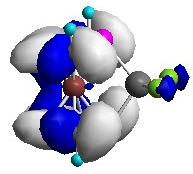


H-18


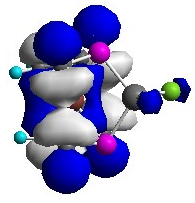


H-19


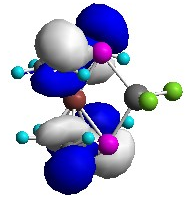


H-20


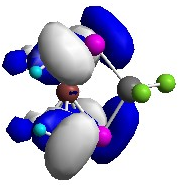


H-21


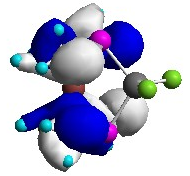


H-22

**Molecular Orbitals of the tmdpf ligand calculated at the BP86/ DZVP2 (C, H, P, Fe) level of theory.**


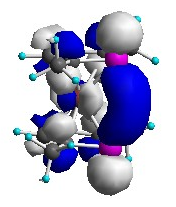


L+2


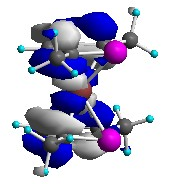


L+1


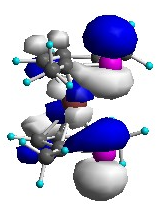


LUMO


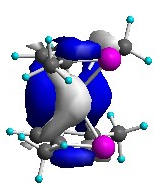


HOMO


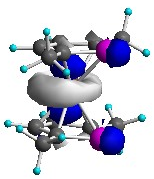


H-1


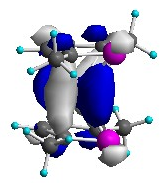


H-2


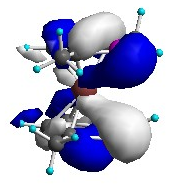


H-3


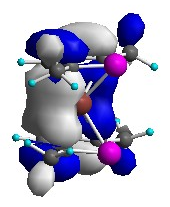


H-4


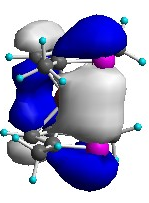


H-5


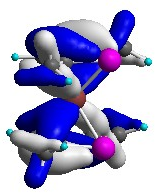


H-6


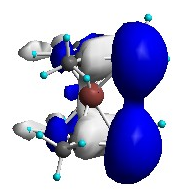


H-7


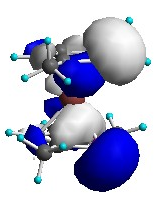


H-8


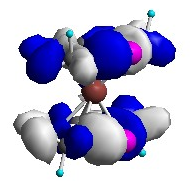


H-9


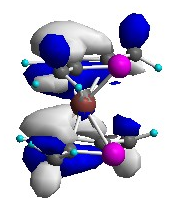


H-10


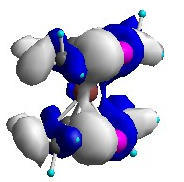


H-11


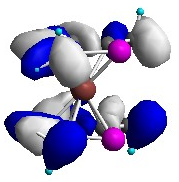


H-12


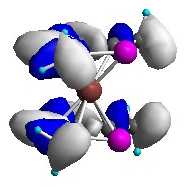


H-13


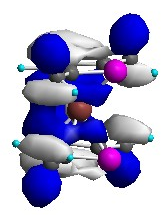


H-14


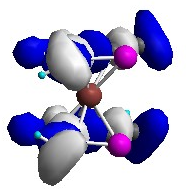


H-15


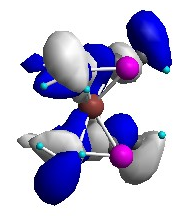


H-16


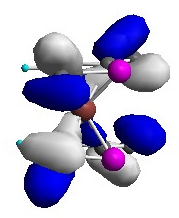


H-17


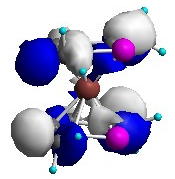


H-18


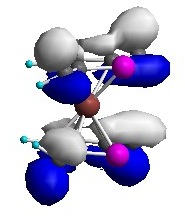


H-19


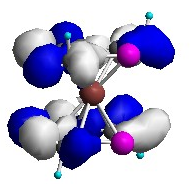


H-17
